# Supplementary material for: Elaboration and mechanical properties of elastomeric fibrous scaffolds based on crosslinked poly(glycerol sebacate) and cyclodextrin for soft tissue engineering
Source: Royal Society of Chemistry journal article supplement (doi:10.1039/d0ma00673d), 2021-01-01
Supplement: d0ma00673d1.pdf [file d0ma00673d1.pdf]

## SUPPLEMENTARY MATERIAL

### Elaboration and mechanical properties of elastomeric fibrous scaffolds based on crosslinked poly(glycerol sebacate) and cyclodextrin for soft tissue engineering

Florence Flaig, Caroline Faria Bellani, Özgün Uyumaz, Guy Schlatter\*, Anne Hébraud\*

ICPEES, Institut de Chimie et Procédés pour l'Energie l'Environnement et la Santé, CNRS UMR 7515, ECPM-Université de Strasbourg, 25 rue Becquerel, 67087 Strasbourg Cedex 2, France.

\* Corresponding authors: Prof. Guy Schlatter, [guy.schlatter@unistra.fr](mailto:guy.schlatter@unistra.fr), Dr. Anne Hébraud, [anne.hebraud@unistra.fr](mailto:anne.hebraud@unistra.fr)

**Note:** the authors declare no competing financial interest.

*NMR analysis of pPGS:*

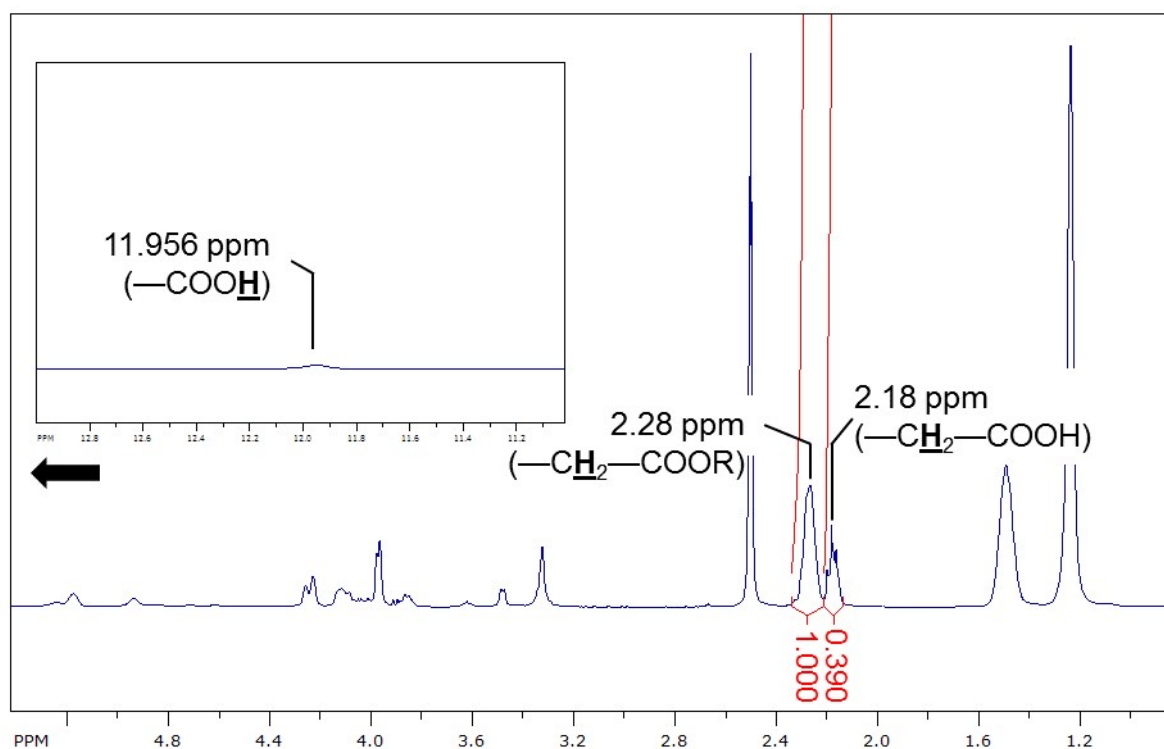

**Figure S1.**  $^1\text{H}$  NMR spectrum of pPGS in  $d\text{-DMSO}$ .

### *Plasticizing effect of pPGS on PVP:*

When using pure PVP as carrier polymer, a high amount of PVP is necessary and continuous fibers are obtained only for pPGS/PVP 30/70 (Figure S2). At lower PVP amounts, the jet was unstable and droplets of solution cover the fibrous scaffold making it look as a film (Figure 2). Moreover, despite the high  $T_g$  of PVP (180°C), pPGS/PVP 30/70 electrospun fibers melted during crosslinking process at 140°C (Figure S2). This could be explained by a plasticizing effect of PVP by pPGS: a decrease of the  $T_g$  of PVP to 83°C was indeed measured by DSC on pPGS/PVP 30/70 electrospun nanofibers (Figure S3). Therefore, PVP alone is not a good carrier polymer for pPGS. HP $\beta$ CD, with a high degradation temperature (278°C), is thus required to keep the fibrous structure during curing and to stabilize the electrospinning process.

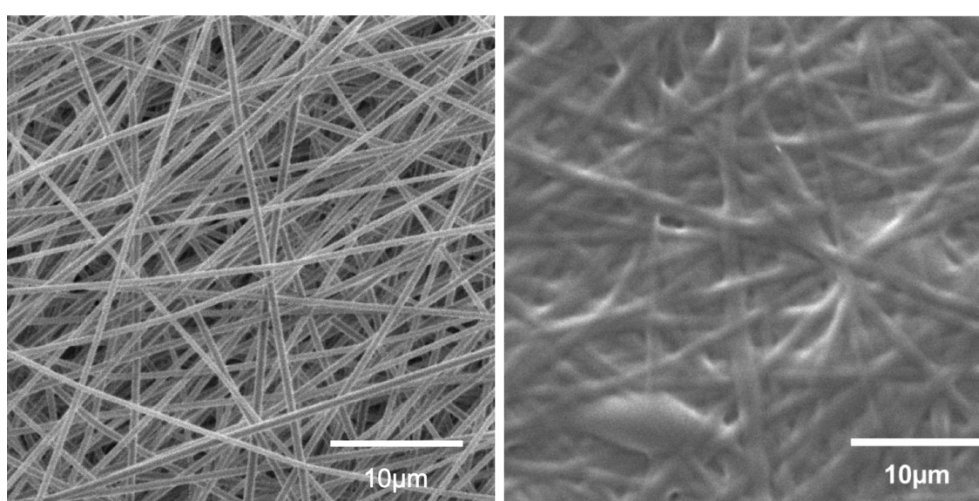

**Figure S2.** SEM picture of an electrospun sample with 30% of pPGS and 70% of PVP as spun and after heating at 140°C.

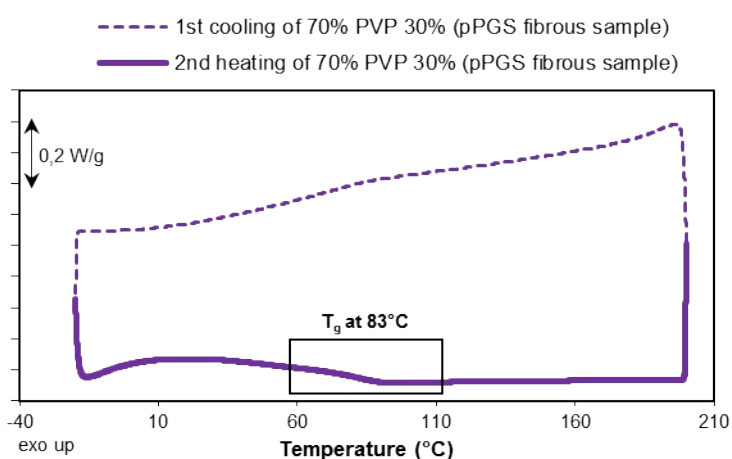

**Figure S3.** Thermogram obtained by DSC (heat-cool-heat cycle at 3°C/min under N<sub>2</sub> atmosphere) for a sample of electrospun fibers fabricated from a solution with 3% of pPGS and 7% of PVP in DMF/Ethanol 3/7.

*Morphology of electrospun fibers:*

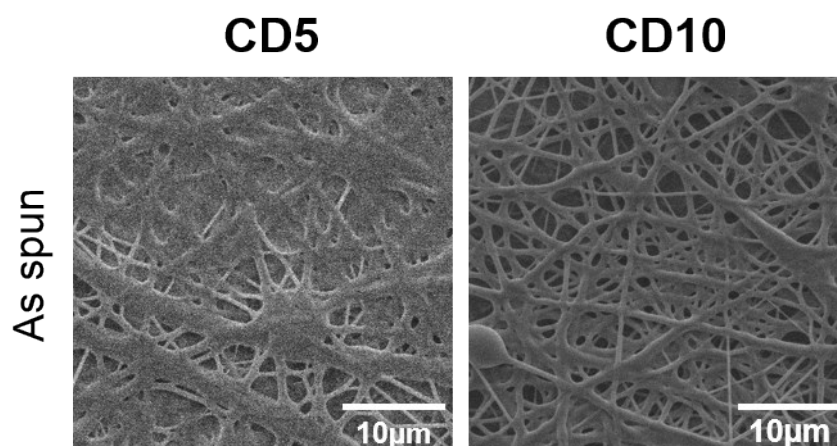

**Figure S4.** SEM pictures of as-spun samples with 50% of pPGS, 5% of HP $\beta$ CD and 45% of PVP (**CD5**) or with 50% of pPGS, 10% of HP $\beta$ CD and 40% of PVP (**CD10**). Samples were obtained after electrospinning of solutions with 13 wt% of solid in DMF/ethanol 3/7.

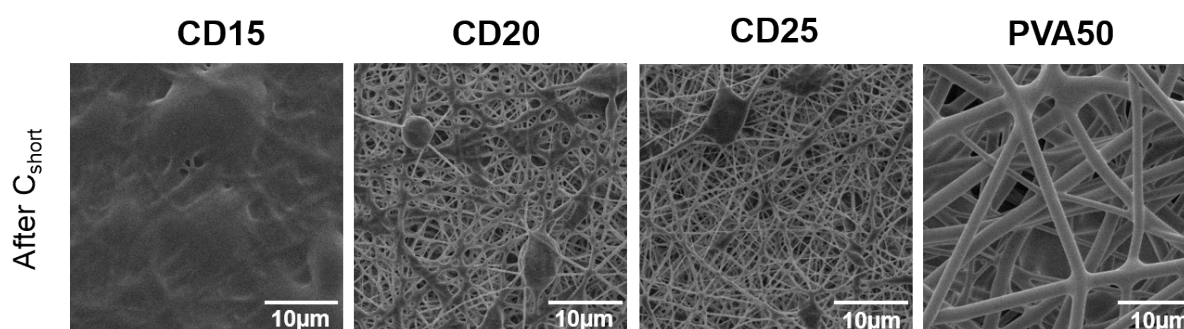

**Figure S5.** SEM pictures of fibrous scaffolds composed of 50% of PGS, 15% of HP $\beta$ CD and 35% of PVP (**CD15**), 50% of PGS, 20% of HP $\beta$ CD and 30% of PVP (**CD20**), 50% of PGS, 25% of HP $\beta$ CD and 25% of PVP (**CD25**), or 50% of pPGS and 50% of PVA (**PVA50**) after the following curing step under vacuum: 24h at 120°C and 48h at 140°C.

*Infra-red supplementary curves:*

*For CD25:*

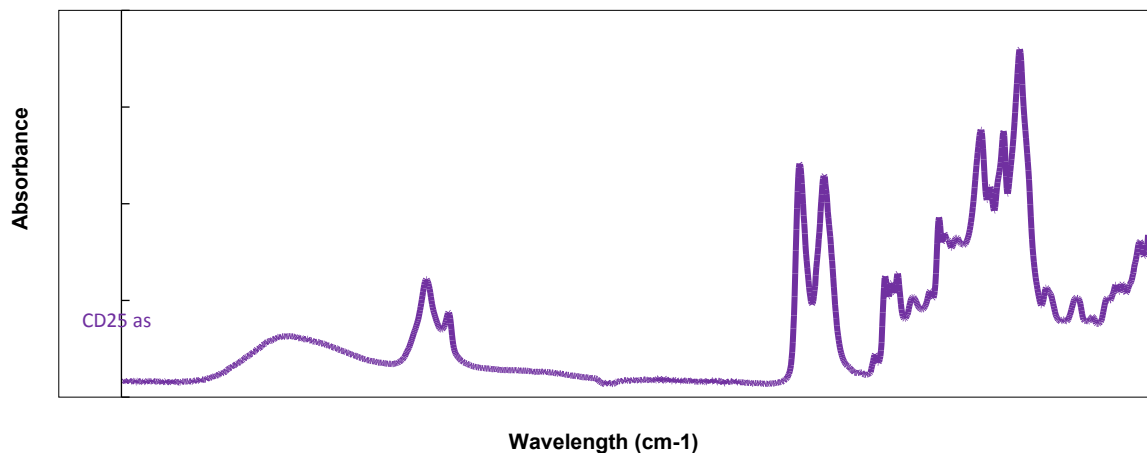

**Figure S6.** Infra-red spectra for CD25 as spun.

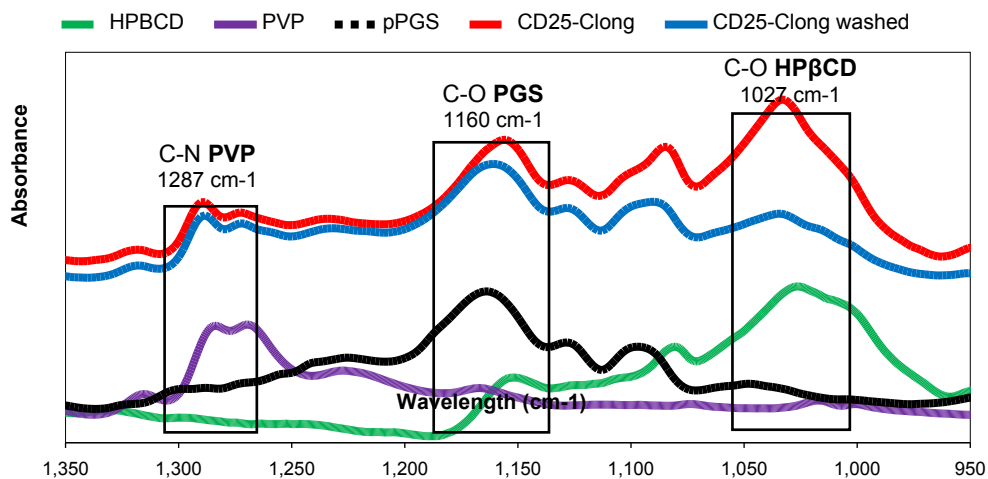

**Figure S7.** Illustration of the effect of washing: evolution of C-N (from PVP) and C-O (from HPβCD) bands before and after washing.

*Infra-red supplementary curves:*

*For PVA50:*

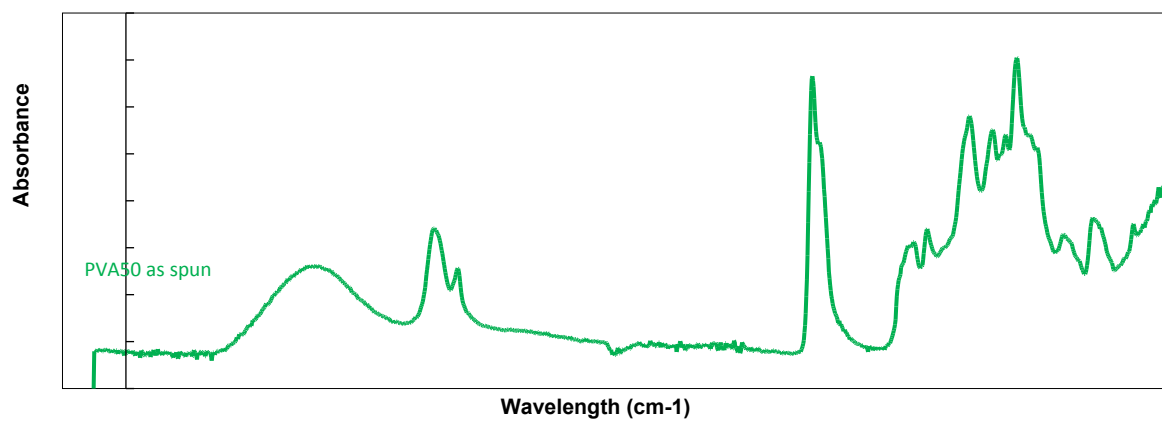

**Figure S8.** Infra-red spectra for PVA50 as spun.

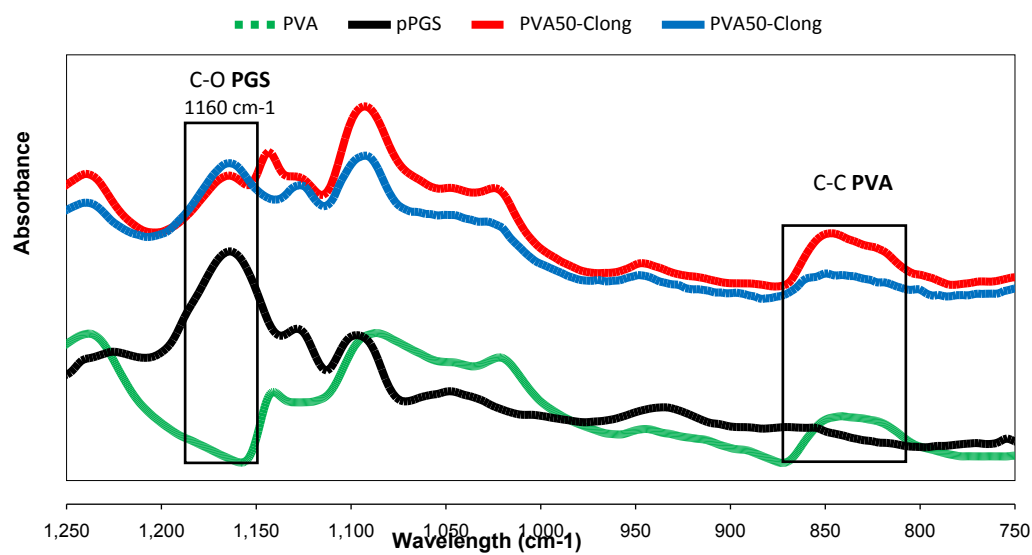

**Figure S9.** Illustration of the effect of washing: evolution of C-C (from PVA) and C-O (from PGS) bands before and after washing.

*Stress-strain curves for tensile tests until break:*

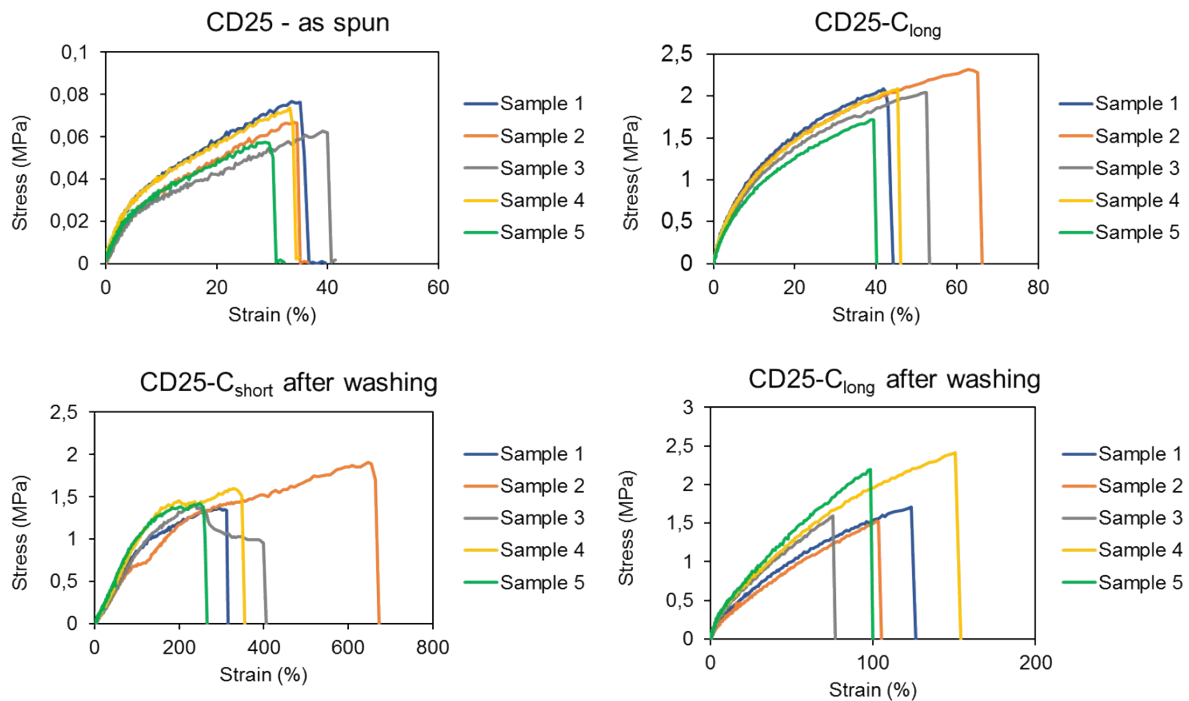

**Figure S10.** Stress-strain curves for **CD25** (50% PGS, 25% HP $\beta$ CD and 25% PVP) before curing, after curing  $C_{long}$  (24h at 120°C, 48h at 140°C and 24h at 170°C) and after washing in water.

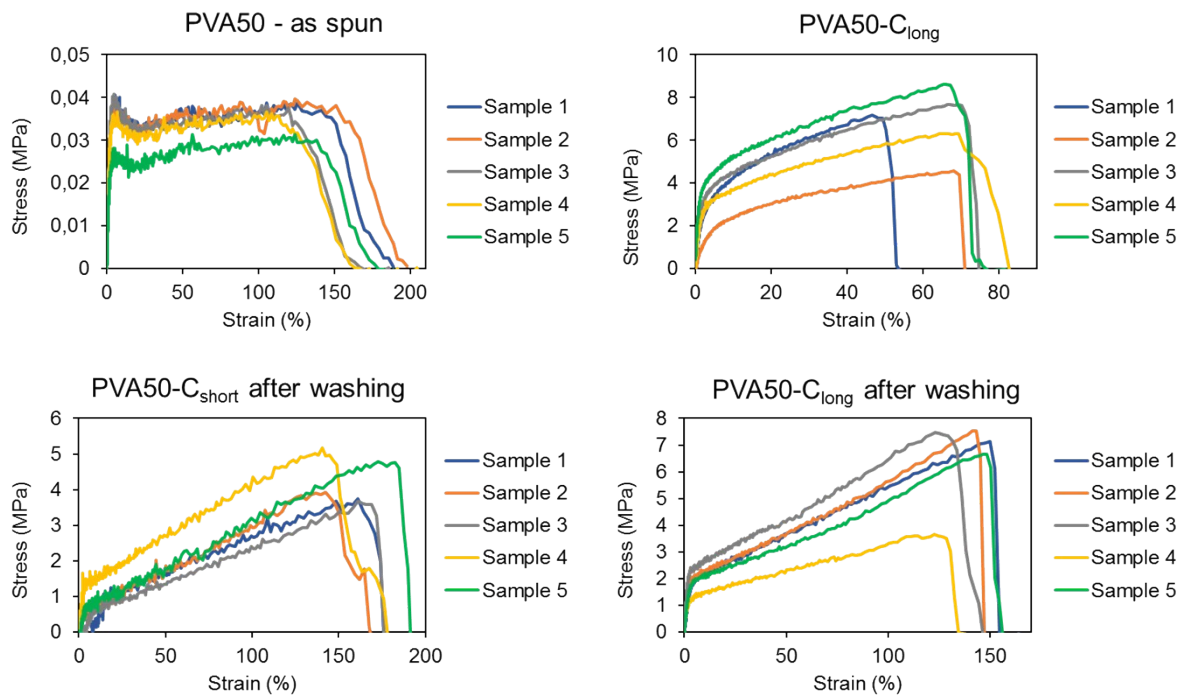

**Figure S11.** Stress-strain curves for **PVA50** (50% PGS and 50% PVA) before curing, after curing  $C_{long}$  (24h at 120°C, 48h at 140°C and 24h at 170°C) and after washing in water.

Stress-strain curves for cyclic tensile tests:

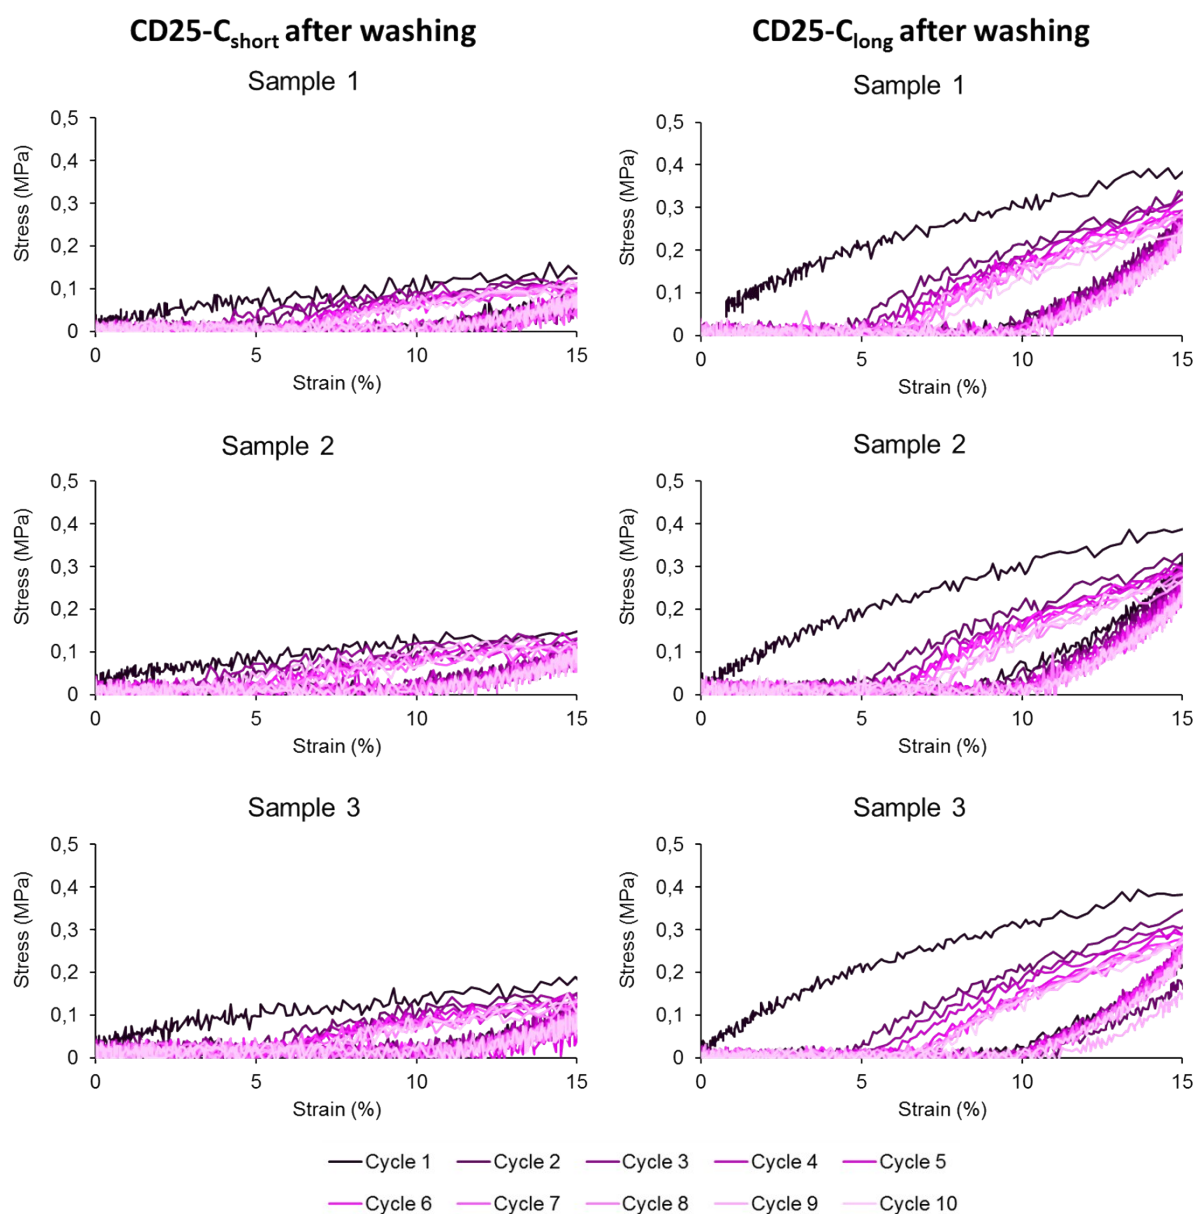

**Figure S12.** Stress-strain curves for cyclic tensile tests on CD25 (50% PGS, 25% HP $\beta$ CD and 25% PVP) after curing C<sub>short</sub> (24h at 120°C and 48h at 140°C) or C<sub>long</sub> (24h at 120°C, 48h at 140°C and 24h at 170°C) and washing in water.



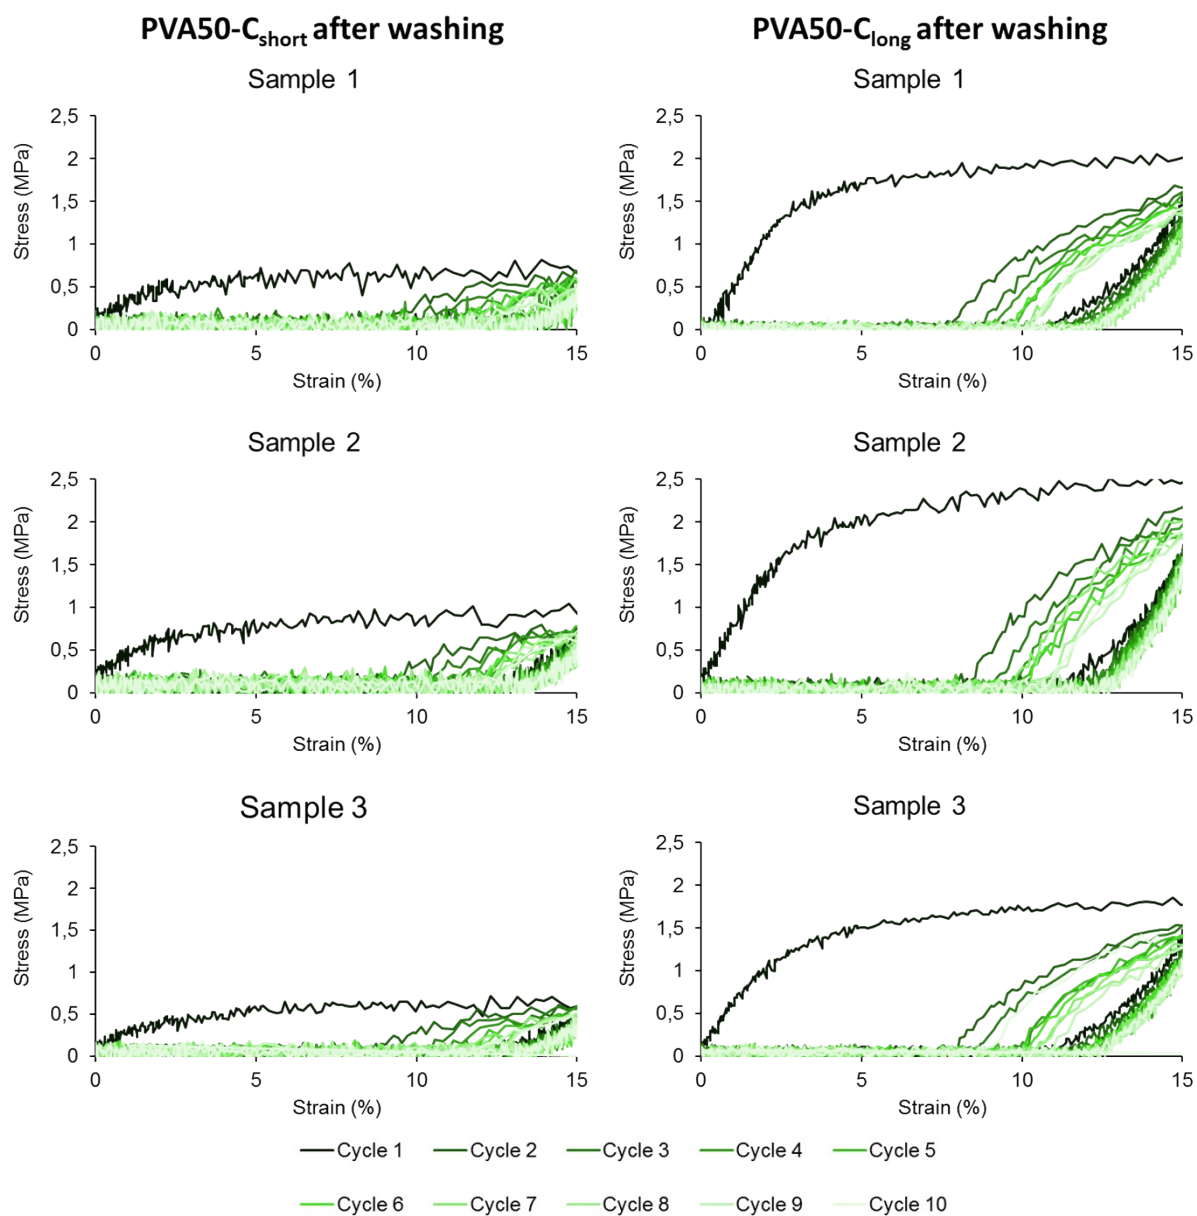

**Figure S13.** Stress-strain curves for cyclic tensile tests on PVA50 (50% PGS and 50% PVA) after curing  $C_{short}$  (24h at 120°C and 48h at 140°C) or  $C_{long}$  (24h at 120°C, 48h at 140°C and 24h at 170°C) and washing in water.
